# Supplementary material for: Secocrassumol, a seco-Cembranoid from the Dongsha Atoll Soft Coral Lobophytum crassum
Source: MDPI journal article supplement (doi:10.3390/md12126028), 2014-12-17

## Supplementary Information

Figure S1.  $^1\text{H}$  NMR spectrum (400 MHz) of secocrassumol in  $\text{CDCl}_3$ .

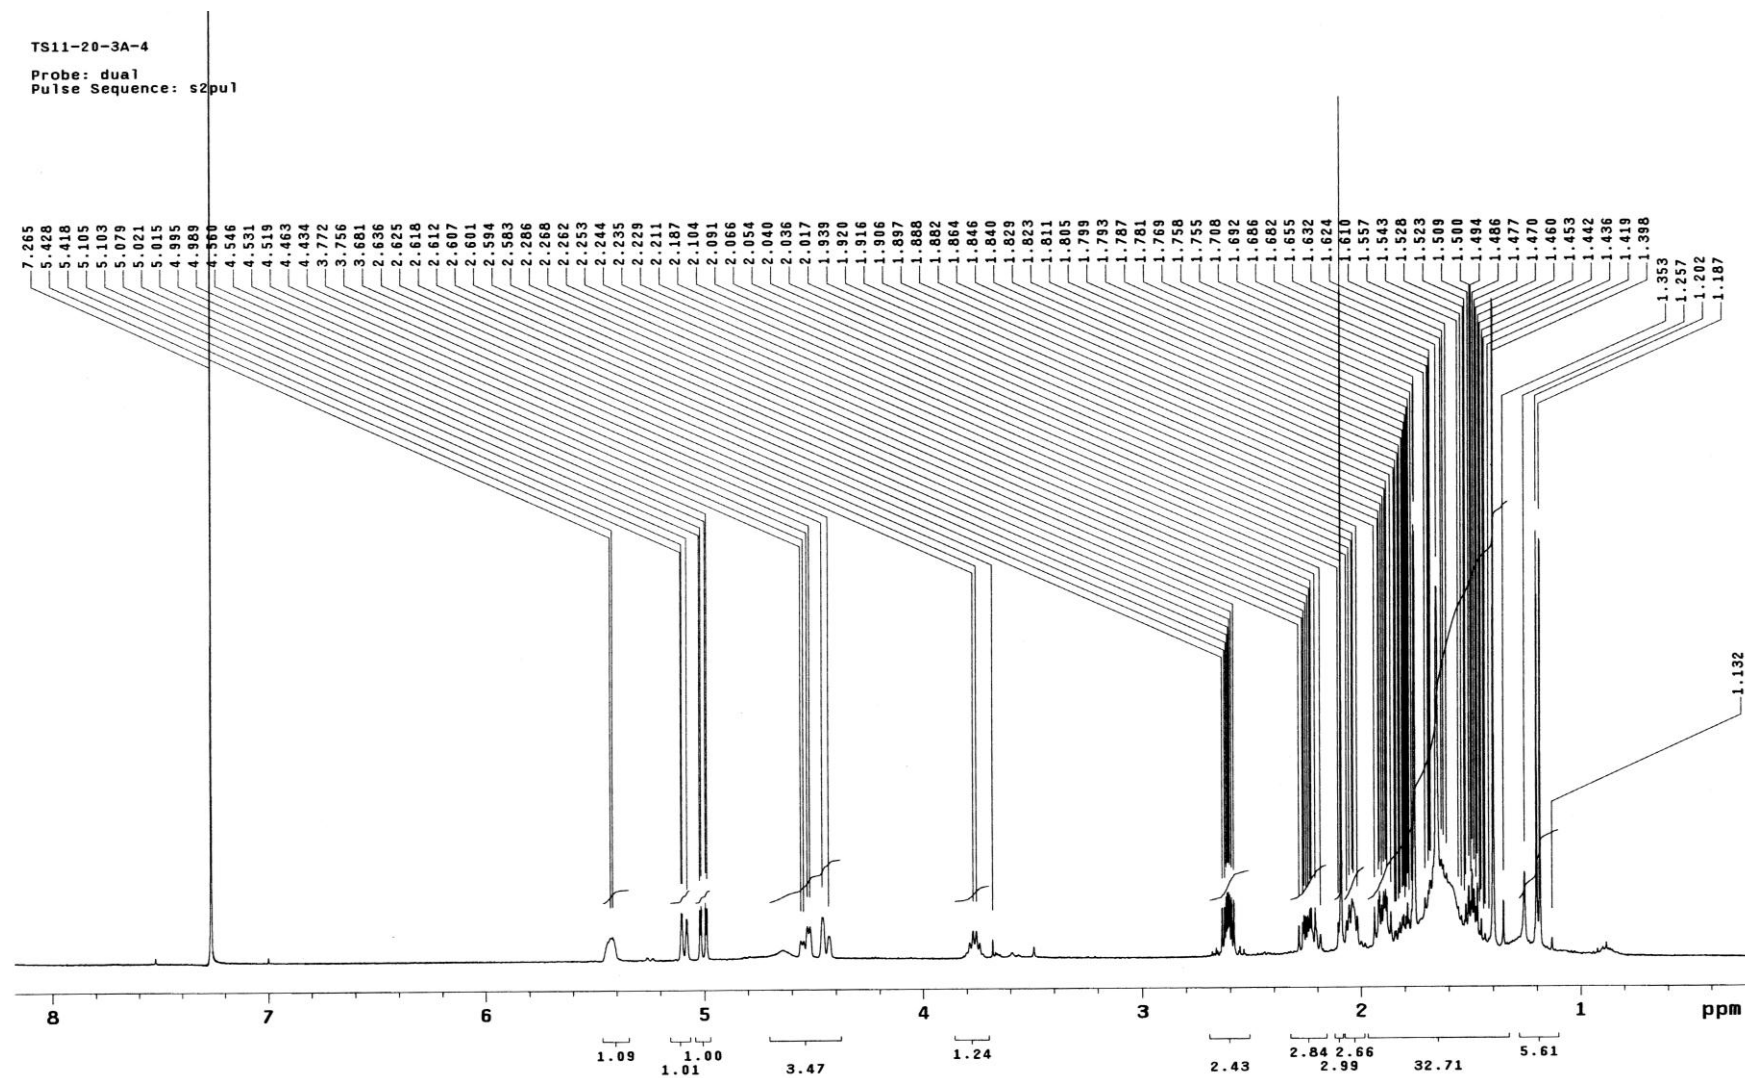

**Figure S2.** DEPT and  $^{13}\text{C}$  NMR spectra (100 MHz) of secocrassumol in  $\text{CDCl}_3$ .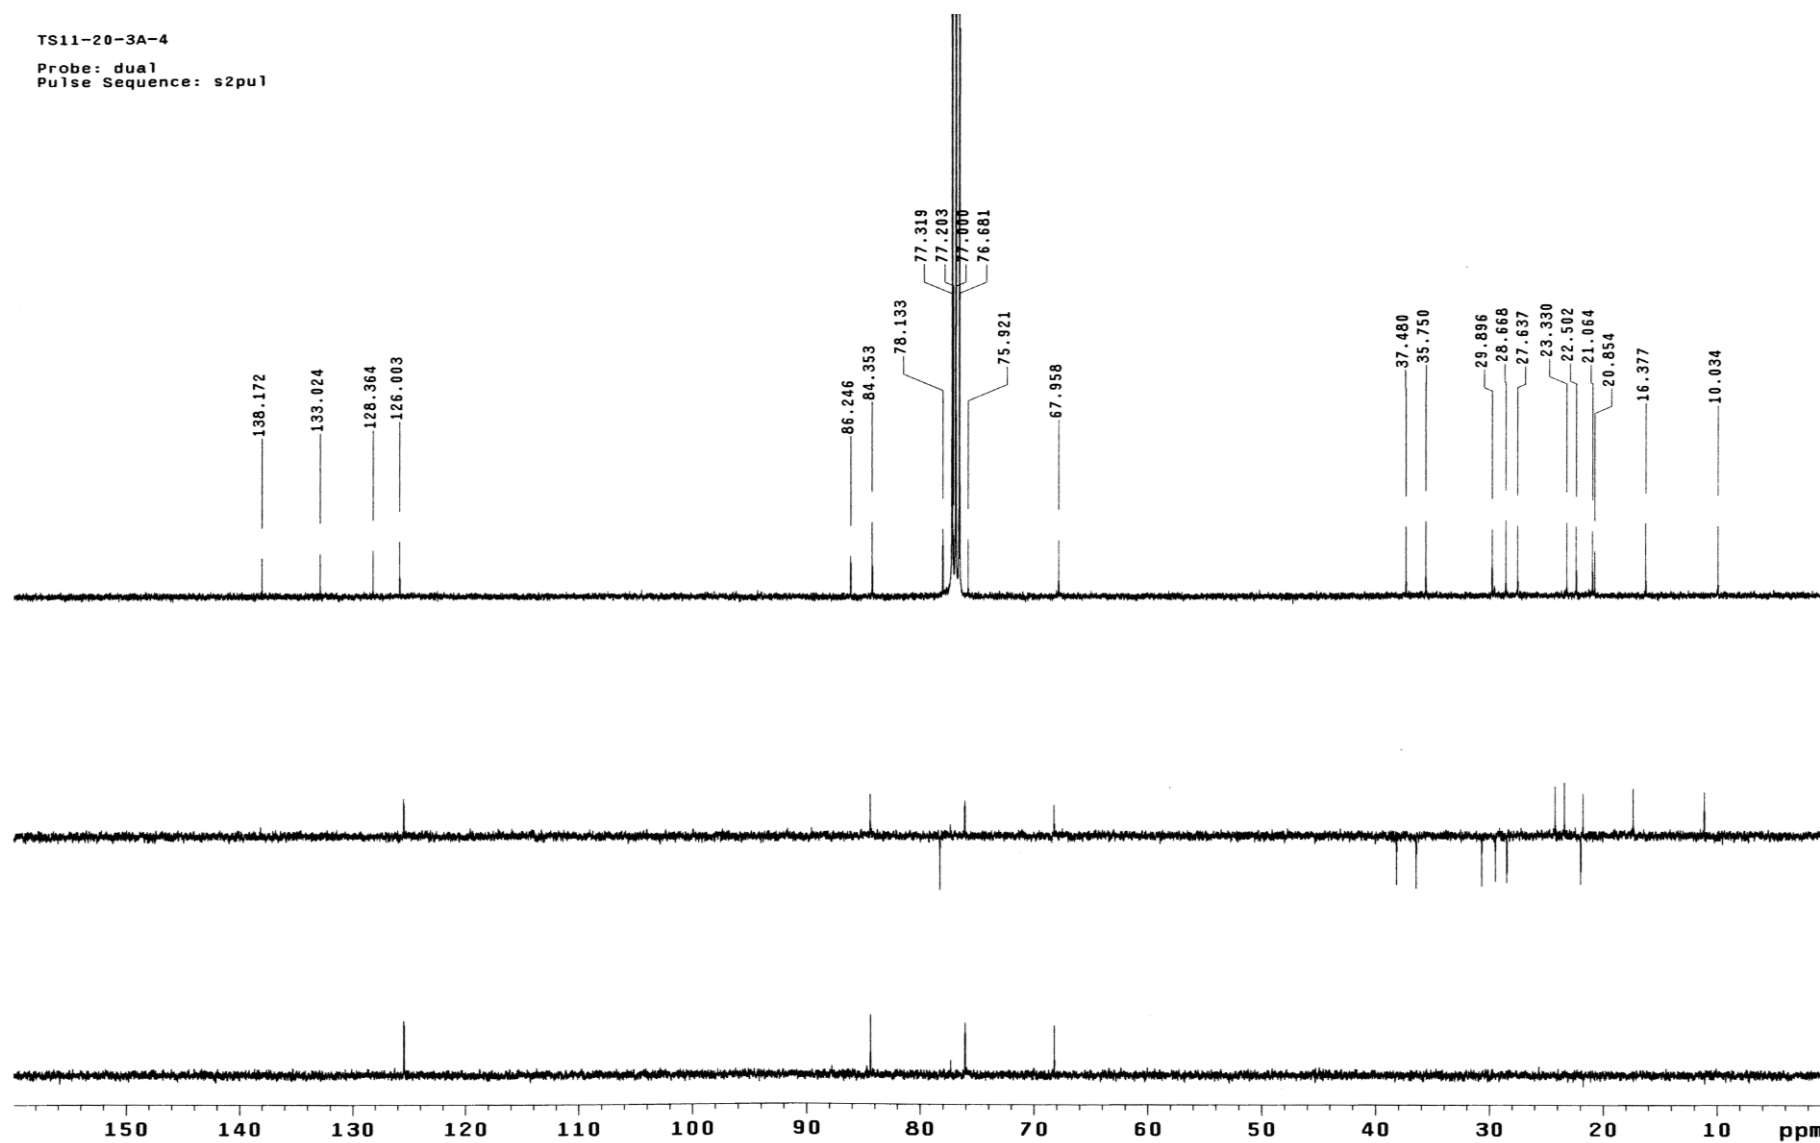

**Figure S3.** HSQC spectrum (400 MHz) of secocrassumol in CDCl<sub>3</sub>.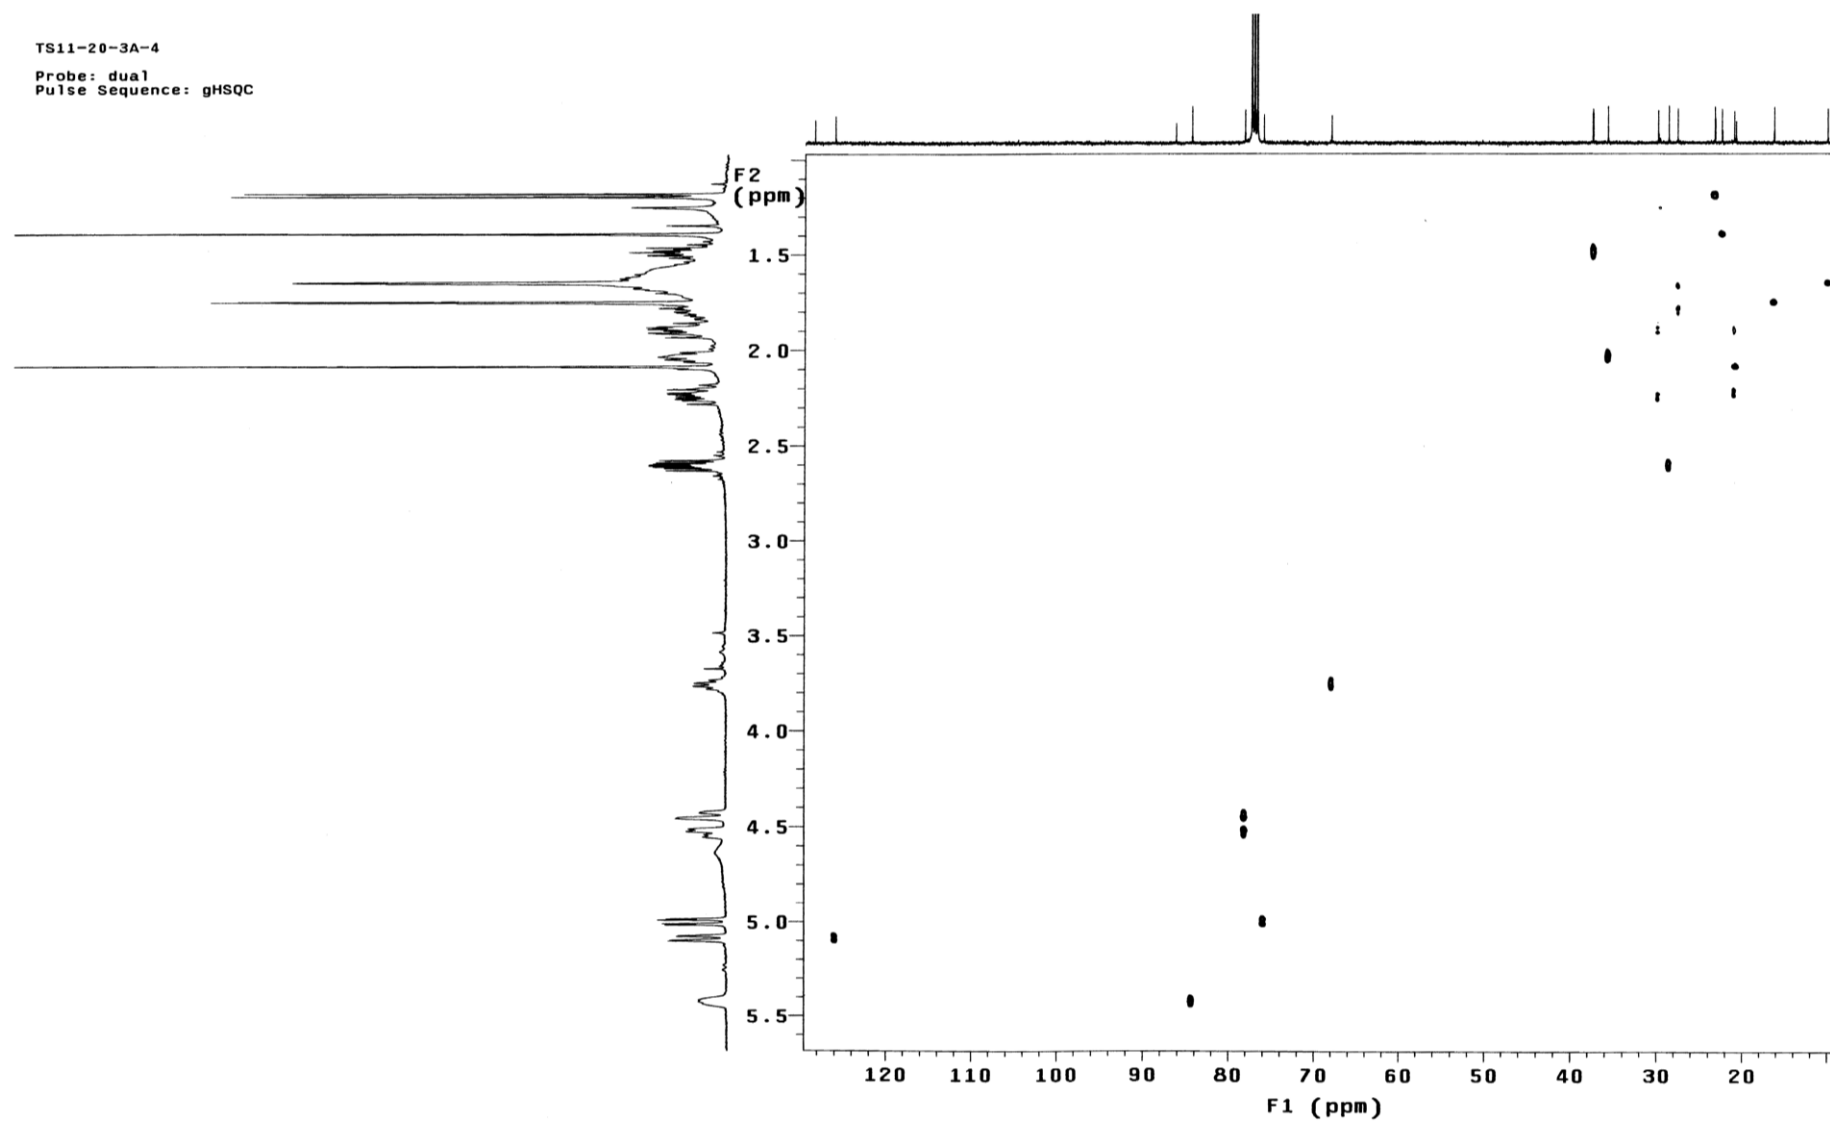

**Figure S4.** HMBC spectrum (400 MHz) of secocrassumol in CDCl<sub>3</sub>.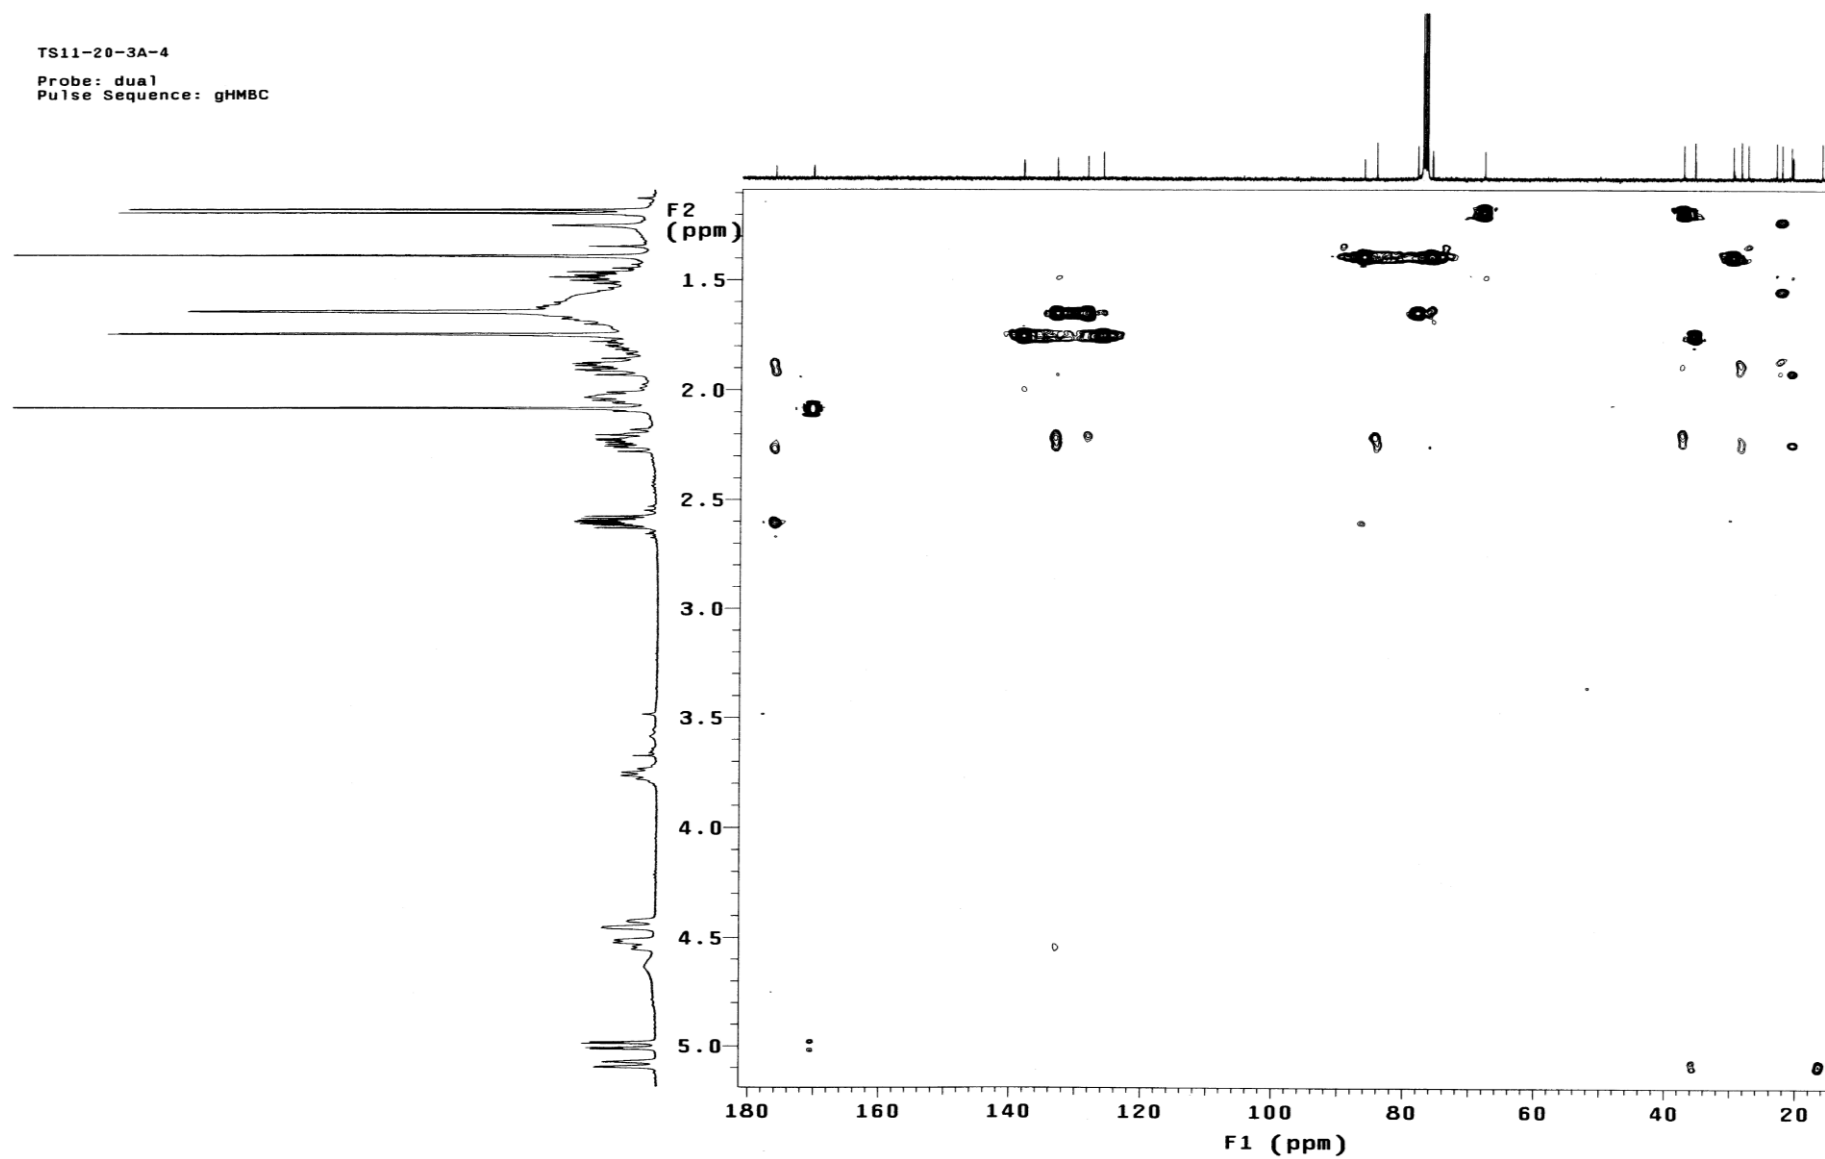

**Figure S5.**  $^1\text{H}$ – $^1\text{H}$  COSY spectrum (400 MHz) of secocrassumol in  $\text{CDCl}_3$ .

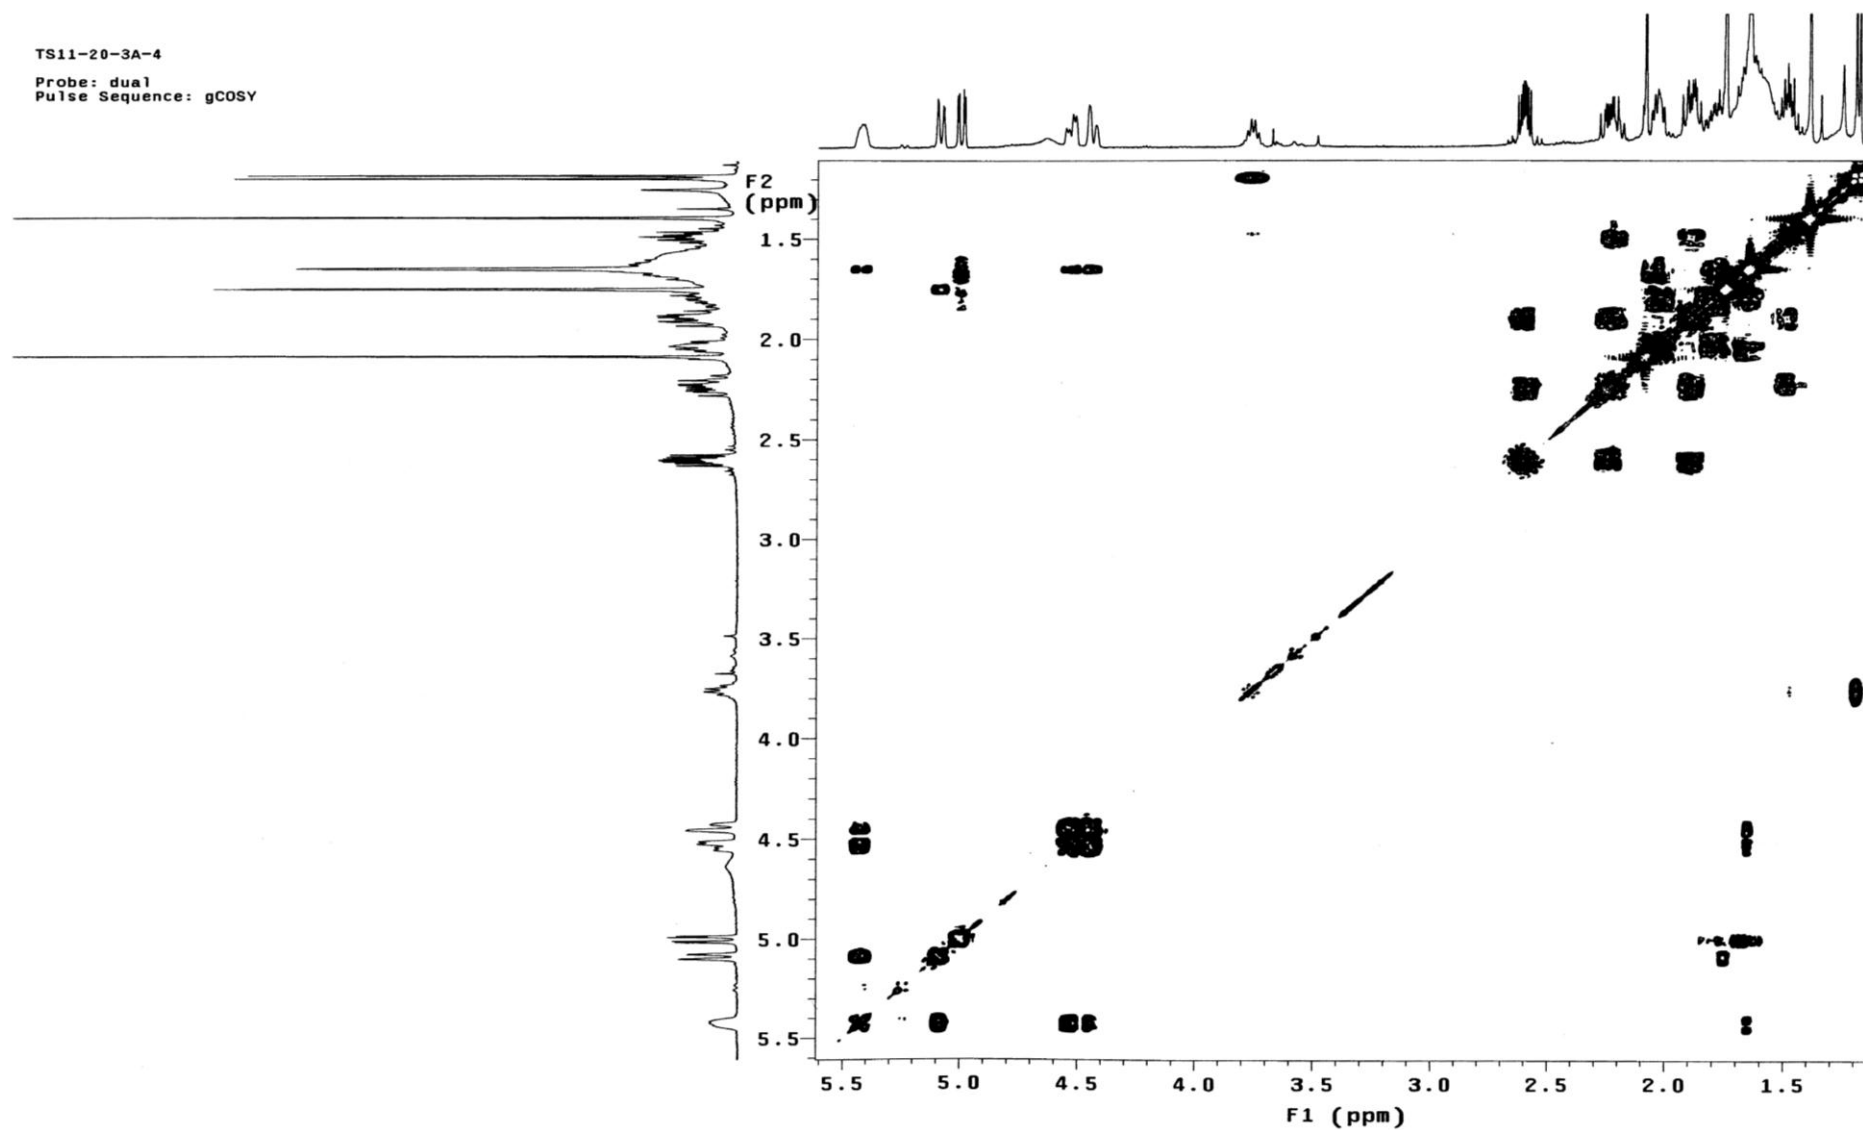

**Figure S6.** NOESY spectrum (400 MHz) of secocrassumol in CDCl<sub>3</sub>.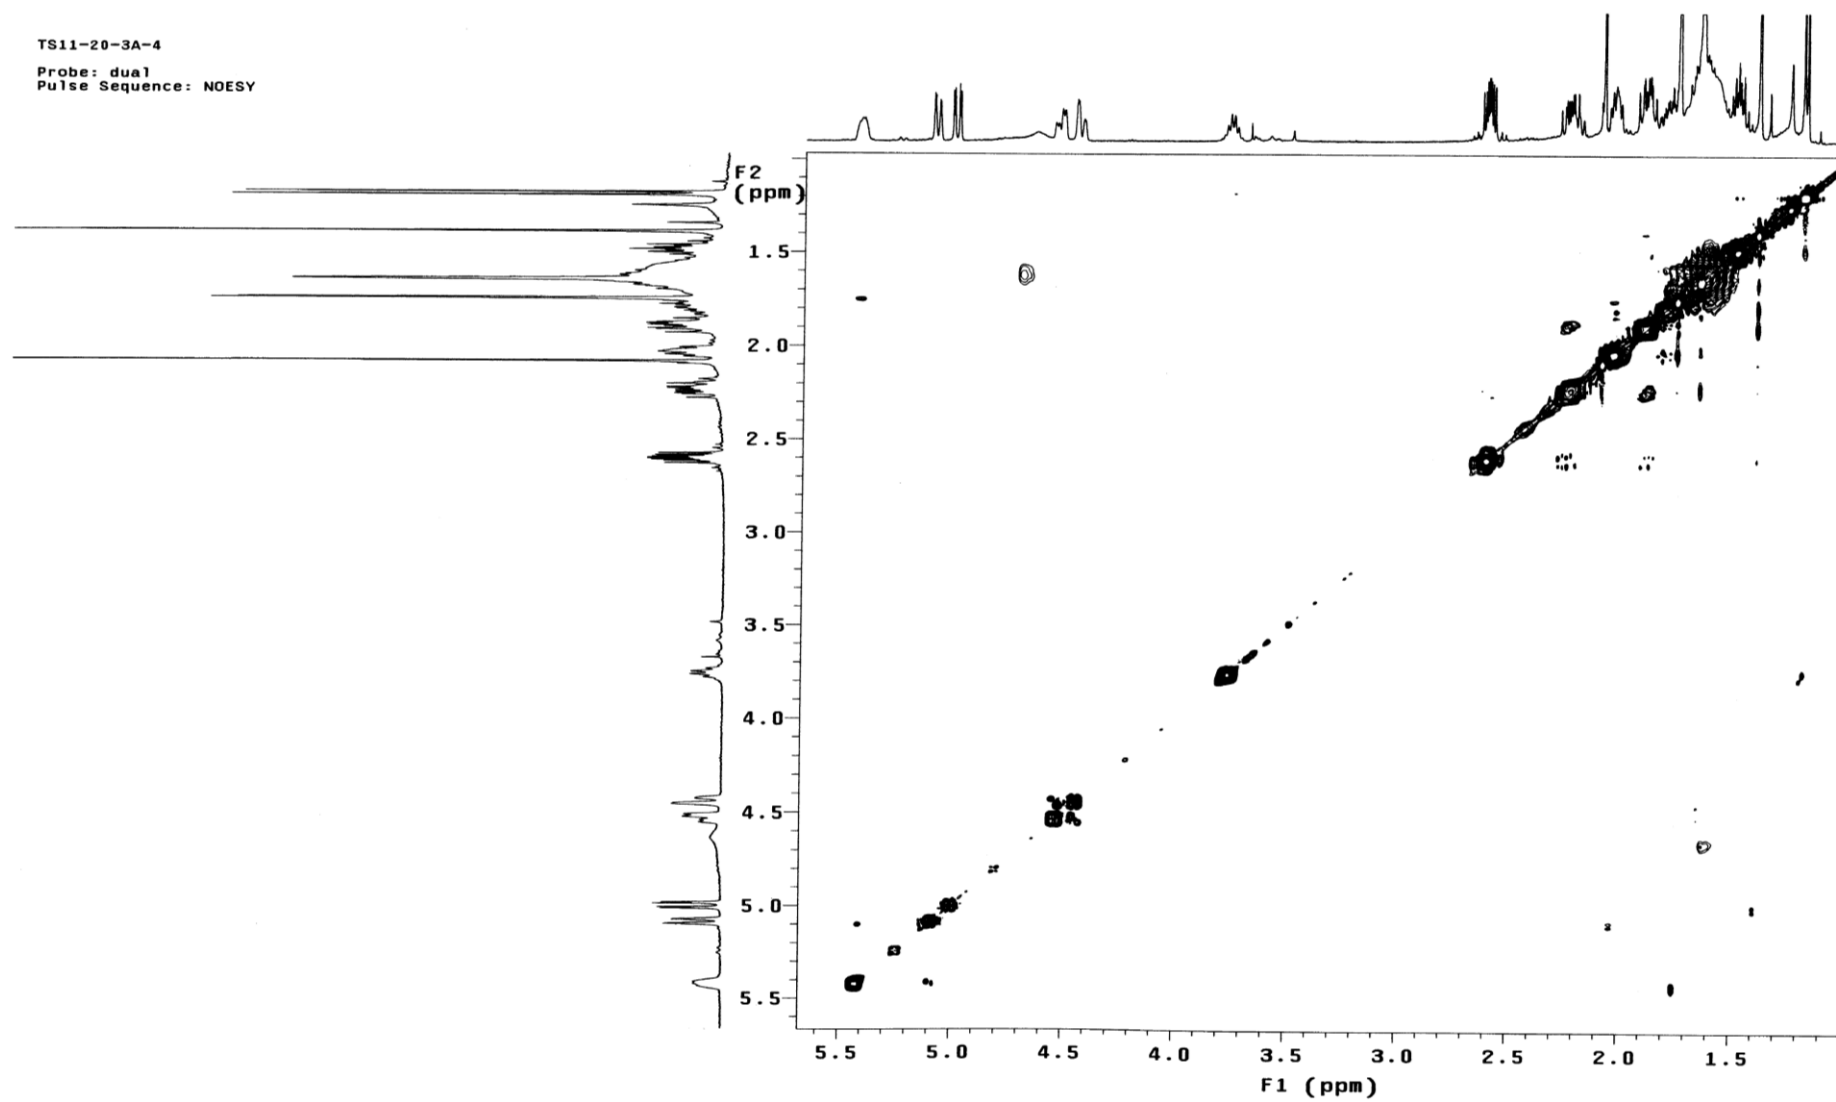

**Figure S7.** HRESIMS spectrum of secocrassumol.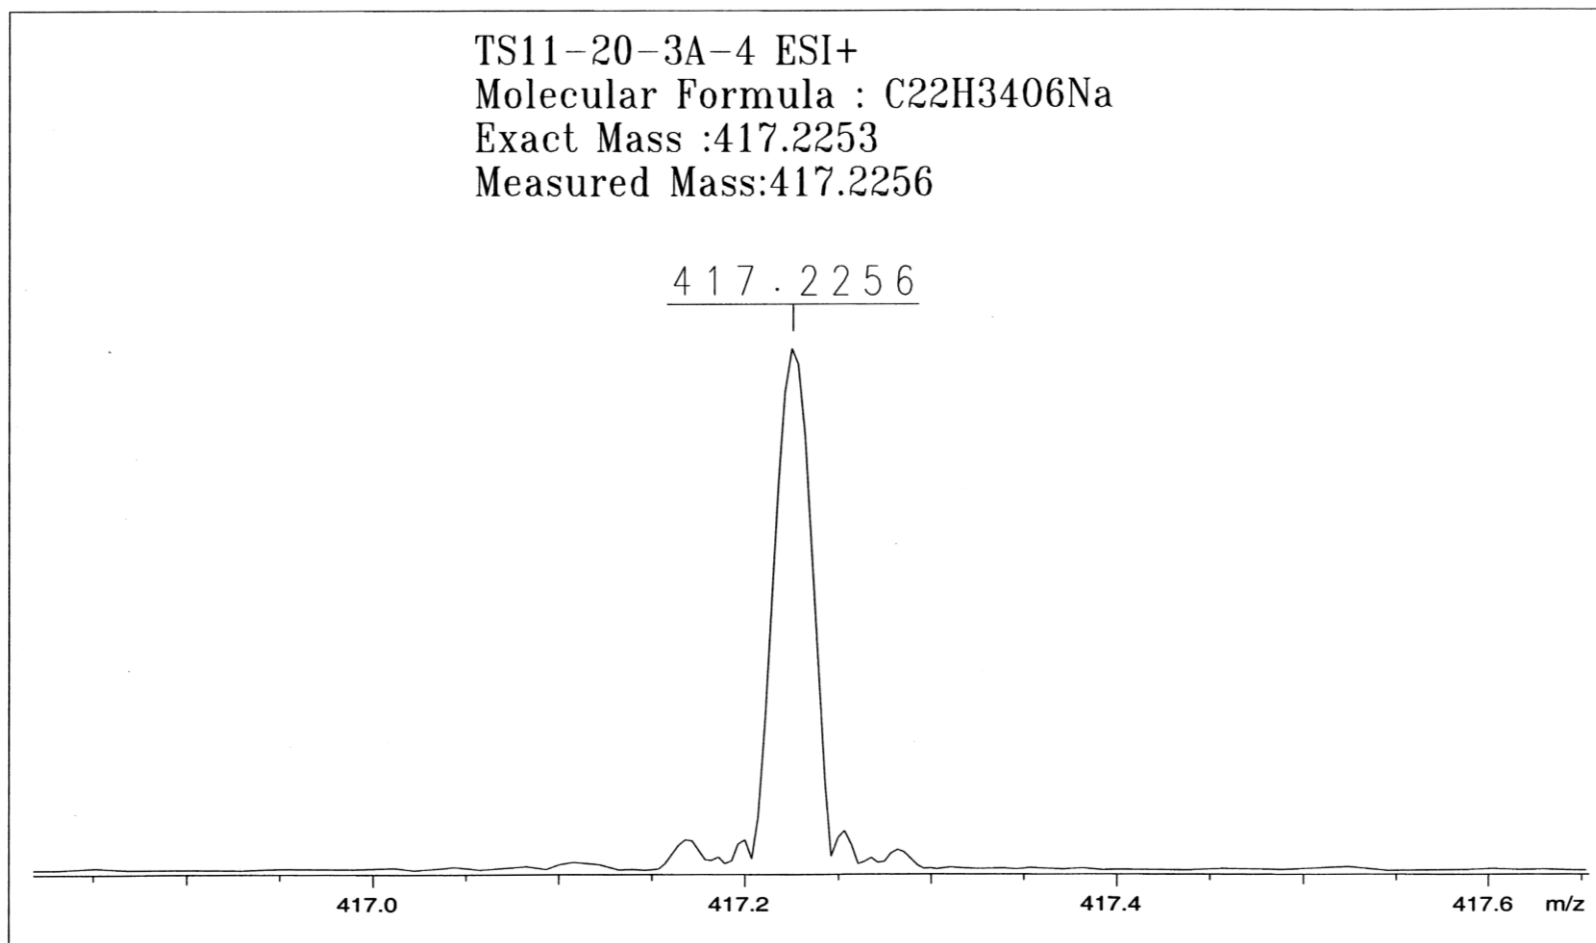

Supplement: s1 [file s1]
